# Supplementary material for: The Quality Control of Midecamycin and the Predictive Demarcation between Its Impurities and Components
Source: MDPI journal article supplement (doi:10.3390/separations9080225), 2022-08-17
Supplement: s1 [file s1]

Archive with 1 entries (1 files):
- separations-1787102-supplementary.pdf
